# Supplementary material
Source: PubMed Central journal article supplement (PMC7609004)
Supplement: ASN.2020050639SupplementaryData1.pdf [file ASN.2020050639SupplementaryData1.pdf]

## SUPPLEMENTAL MATERIAL

| <b>Supplementary Table: Demographic, comorbidities and treatment characteristics of deceased patients</b> |                                 |
|-----------------------------------------------------------------------------------------------------------|---------------------------------|
| <b>Demographic characteristics</b>                                                                        | <b>Deceased patients (N=16)</b> |
| Age – yr (SD)                                                                                             | 61.9±9.6                        |
| Male sex – no. (%)                                                                                        | 8 (50)                          |
| Non-Caucasian – no. (%)                                                                                   | 4 (25)                          |
| Blood group – no. (%)                                                                                     |                                 |
| A                                                                                                         | 6 (38)                          |
| B                                                                                                         | 3 (19)                          |
| O                                                                                                         | 7 (43)                          |
| AB                                                                                                        | 7 (43)                          |
| Cause of end stage renal disease – no. (%)                                                                |                                 |
| Glomerular disease                                                                                        | 1 (6)                           |
| Diabetes                                                                                                  | 3 (19)                          |
| Vascular                                                                                                  | 5 (31)                          |
| Other                                                                                                     | 7 (44)                          |
| Deceased donor – no. (%)                                                                                  | 14 (100)                        |
| Prior kidney transplant – no. (%)                                                                         | 1 (6)                           |
| Time on dialysis prior to transplantation – mo (SD)                                                       | 65.9 (42.1)                     |
| Multiorgan recipients – no. (%)                                                                           | 0(0)                            |
| Time from transplant – mo (SD)                                                                            | 51.8 (48.1)                     |
| Recent episode of rejection – no. (%)                                                                     | 2 (13)                          |
| Serum creatinine – micromol/L (SD)                                                                        | 160 (86)                        |

| <b>Supplementary Table. (Continued)</b>                  |         |
|----------------------------------------------------------|---------|
| <b>Comorbidities – no. (%)</b>                           |         |
| Smoke                                                    | 0 (0)   |
| Obesity                                                  | 5 (31)  |
| Diabetes                                                 | 11 (69) |
| Hypertension                                             | 15 (94) |
| Asthma and chronic pulmonary disease                     | 3 (19)  |
| Cardiovascular disease                                   | 0 (0)   |
| <b>Maintenance immunosuppressive therapies – no. (%)</b> |         |
| Prednisone                                               | 13 (81) |
| Tacrolimus                                               | 10 (63) |
| Cyclosporine                                             | 4 (25)  |
| Mycophenolate mofetil or mycophenolic acid               | 12 (75) |
| Belatacept                                               | 2 (13)  |
| Azathioprine                                             | 2 (13)  |

## Supplementary figure

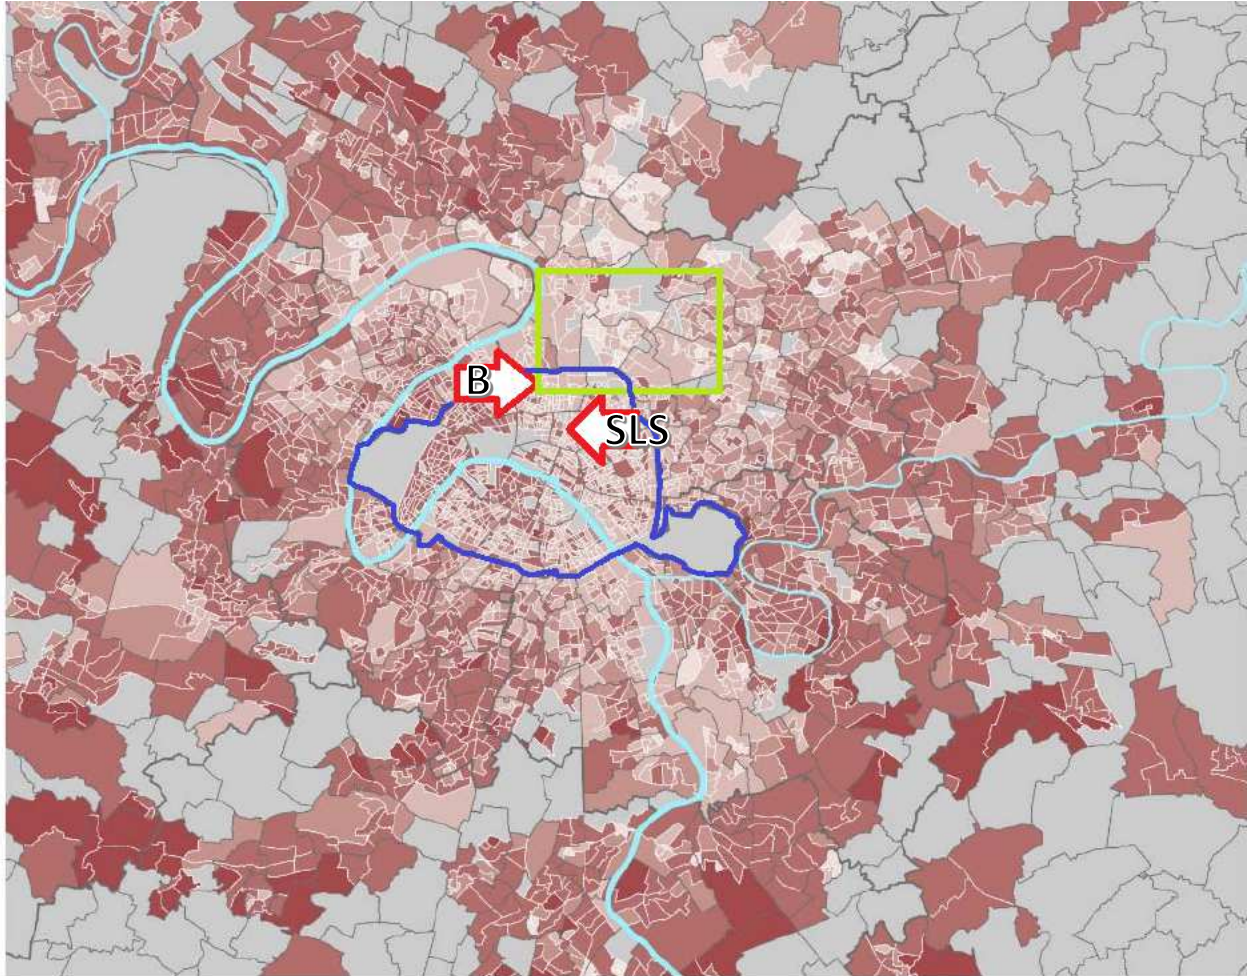

Supplementary figure. Ile de France area. The scale of brown represents the mean home surface for person in (m<sup>2</sup>, the light brown being the lower surface per individual (i.e. higher person density). In blue the boundaries of Paris city centre, in green the Seine-Saint-Denis area. Red arrows show the position of Saint-Louis (SLS) and Bichat (B) hospitals. Picture adapted from the ORS Ile-de-France report on COVID-19, April 2020. (<https://94.citoyens.com/wpcontent/blogs.dir/2/files/2020/05/ORS>)
